# Supplementary material for: A bio-based thermoplastic polyurethane with triple self-healing action for wearable technology and smart textiles
Source: Royal Society of Chemistry journal article supplement (doi:10.1039/d4ma00289j), 2024-01-01
Supplement: d4ma00289j1.pdf [file d4ma00289j1.pdf]

## Electronic Supplementary Information

### **A Bio-based Thermoplastic Polyurethane with Triple Self-healing**

### **Action for Wearable Technology and Smart Textiles**

*Thomas Griggs<sup>a</sup>, Jubair Ahmed<sup>b</sup>, Hamta Majd<sup>b</sup>, Mohan Edirisinghe<sup>b</sup>, Biqiong Chen<sup>a\*</sup>*

<sup>a</sup>School of Mechanical and Aerospace Engineering, Queen's University Belfast, Stranmillis Road, Belfast BT9 5AH, United Kingdom

<sup>b</sup>Department of Mechanical Engineering, University College London, Torrington Place, London WC1E 7JE, United Kingdom

\*Corresponding Author. *Email Address:* [b.chen@qub.ac.uk](mailto:b.chen@qub.ac.uk)

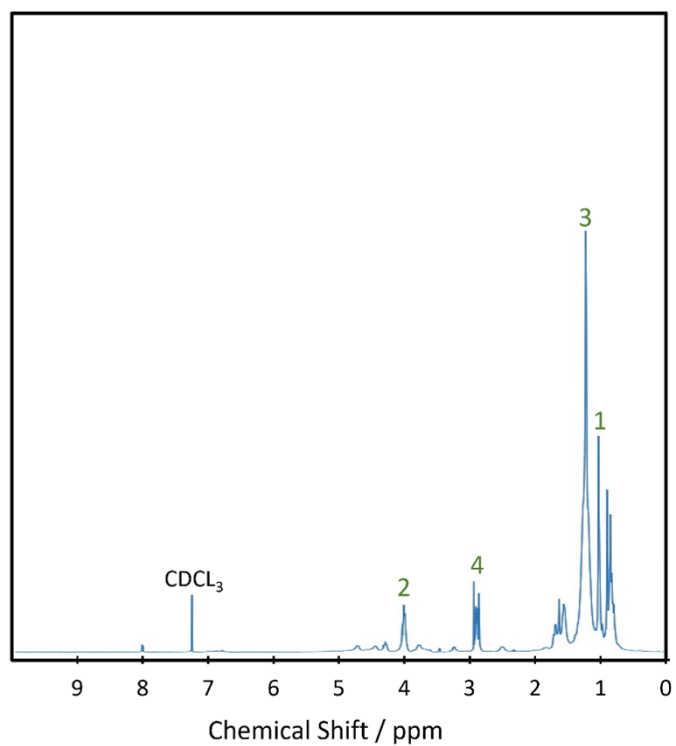

**Fig. S1** <sup>1</sup>H NMR spectrum for P35

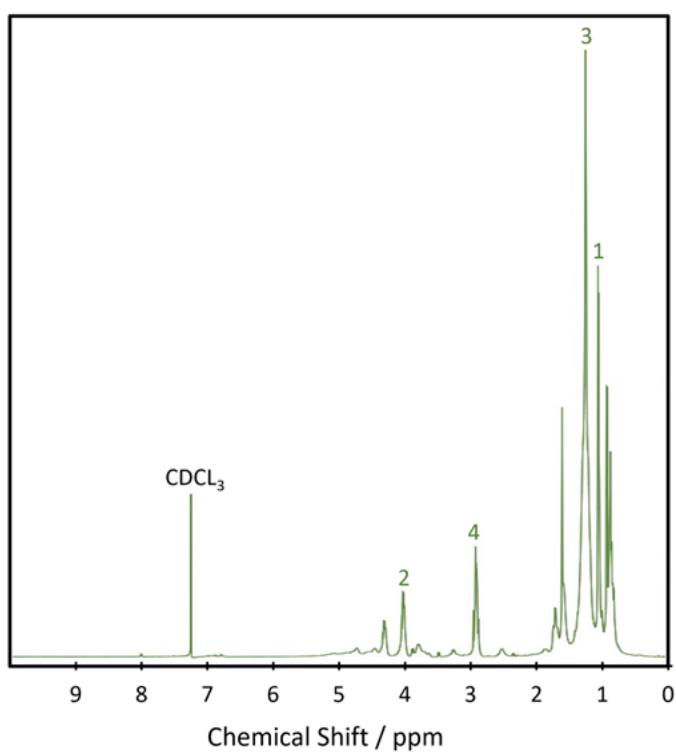

**Fig. S2** <sup>1</sup>H NMR spectrum for P45

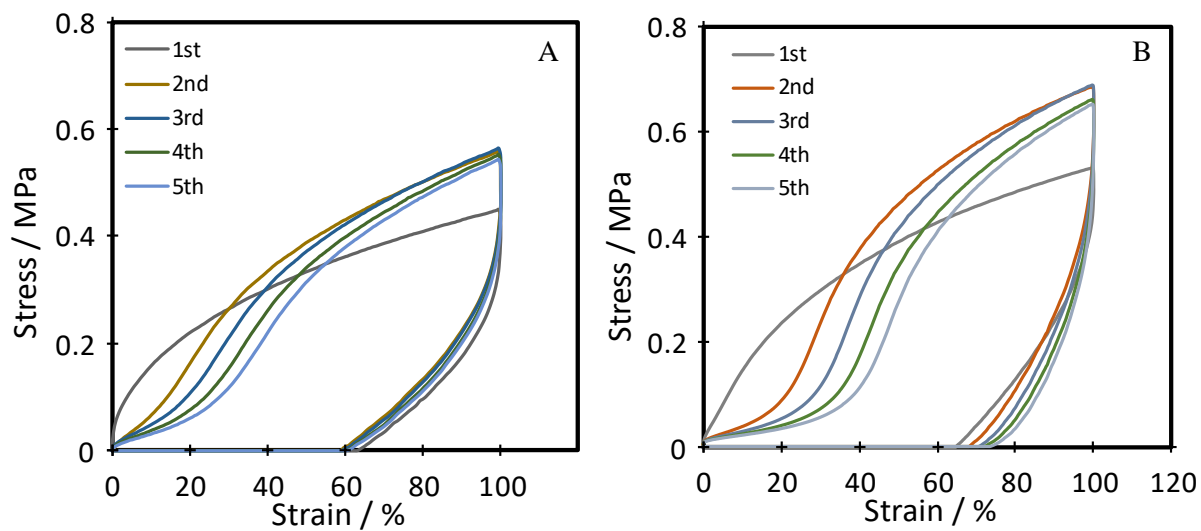

**Fig. S3** Cyclic tensile plots for P40 carried out at (A) 100 mm.min<sup>-1</sup> and (B) 200 mm.min<sup>-1</sup>, with no rest time given between cycles.
